# Supplementary material
Source: Research Square preprint supplement (doi:10.21203/rs.3.rs-10317126/v1)
Supplement: Supplementary file 1 [file 69093d9b8479d7223416a5d0.docx]

**Supplemental Methodology**

**Outcome Variable**

The primary outcome was a binary indicator of whether the admission treatment plan included MOUD. MOUD was defined as planned use of methadone, buprenorphine, or extended-release naltrexone at the time of admission, as recorded in the TEDS Minimum Data Set. Admissions with documented MOUD planning were coded as 1; opioid-related admissions without a documented MOUD plan were coded as 0.

This measure reflects documented treatment planning at admission rather than medication receipt. Although medication initiation, retention, and treatment outcomes are important clinical measures, TEDS does not collect longitudinal information on MOUD receipt following admission. As the primary federal reporting system supporting oversight of the SUBG, TEDS currently captures documented MOUD planning as the only nationally standardized MOUD-related implementation measure. Accordingly, this study evaluates documented MOUD planning as an indicator of implementation within publicly funded treatment systems rather than as a measure of treatment effectiveness. Evaluation of existing federal performance measures is particularly important because modifications to national reporting requirements impose reporting burden on treatment providers and SSA and require review under the Paperwork Reduction Act (PRA) and approval by the Office of Management and Budget (OMB).

**Exposure**

Medicaid expansion under the Affordable Care Act was examined as a major financing reform that may have influenced implementation of MOUD within publicly funded treatment systems supported through the SUBG. To assess whether documented MOUD planning changed following expansion, an event-time variable was constructed relative to each state's Medicaid expansion year. One year prior to expansion served as the reference category. Non-expansion states contributed to estimation of national trends and fixed effects throughout the study period.

Admission-level covariates were selected based on theoretical relevance and availability in TEDS. These included demographic characteristics (race, sex, Hispanic ethnicity, age group, and education), social and structural factors (employment status, homelessness, pregnancy status, and criminal justice referral), treatment history (prior treatment episodes), and clinical characteristics at admission (injection drug use and substance-use profile, including hallucinogens, cannabis, stimulants, cocaine, alcohol, central nervous system depressants, and other drugs).

Categorical variables were harmonized across study years using TEDS public-use codebooks. Race, sex, and education variables included explicit "Not Reported" categories. In TEDS, these categories primarily reflect information not reported by providers or states or not collected within state reporting systems rather than individual-level nonresponse. These categories were retained to preserve the analytic sample and account for structural reporting variation across jurisdictions. Adolescents aged 12–17 years were selected as the reference group for age to facilitate interpretation of age-related differences in documented MOUD planning.

**Statistical Model Specification**

We estimated multivariable logistic regression models within a difference-in-differences framework using an event-time specification:

indicates whether admission *i* in state *s* and year *t* included a documented MOUD plan;

represents indicator variables for years relative to Medicaid expansion (with one year prior to expansion as the omitted reference category);

denotes state fixed effects;

denotes calendar-year fixed effects;

represents admission-level covariates; and

Standard errors are clustered at the state level.

An event-study specification was used because Medicaid expansion was implemented at different times across states. State fixed effects account for time-invariant differences across states, including baseline treatment infrastructure, reporting systems, and policy environments. Calendar-year fixed effects adjust for national secular trends in documented MOUD planning. Standard errors were clustered at the state level to account for within-state correlation arising from shared policy, treatment, and reporting environments.

Results are presented as adjusted odds ratios (aORs) with 95% confidence intervals. Pre-expansion event-time estimates were examined to assess whether documented MOUD planning followed similar patterns prior to Medicaid expansion. None of the pre-expansion event-time coefficients were statistically significant.

To facilitate interpretation of the event-study estimates, adjusted predicted probabilities of documented MOUD planning were estimated using post-estimation marginal effects following the fully adjusted logistic regression model. Predicted probabilities were calculated for each event-time category while averaging over the observed distribution of all covariates in the analytic population. Ninety-five percent confidence intervals were calculated using the delta method. These estimates were used to construct Figure 1.

To examine temporal patterns beyond Medicaid expansion, pairwise comparisons of calendar-year fixed effects were conducted using Bonferroni-adjusted tests for multiple comparisons. Results are presented in Supplement Table 1. Because calendar-year fixed effects represent national secular trends independent of Medicaid expansion, these analyses were conducted to assess whether documented MOUD planning changed over time after accounting for state fixed effects, Medicaid expansion timing, and admission characteristics.

State-specific adjusted odds ratios were estimated from the fully adjusted model and mapped to examine geographic variation in documented MOUD planning after adjustment for Medicaid expansion timing, calendar-year effects, and admission characteristics (Figure 2). The mapping was completed using ArcGIS Pro. All analyses were conducted using Stata 19.5 (StataCorp LLC, College Station, TX).
