# Supplementary material
Source: Research Square preprint supplement (doi:10.21203/rs.3.rs-10317126/v1)
Supplement: Supplementary file 2 [file f9bbb4c368ec84e4cf865cdc.docx]

Supplement Table 1. Bonferroni-Adjusted Comparisons of Calendar-Year Effects Relative to 2014

| **Year Comparison** | **Contrast** | **95% CI** |
| --- | --- | --- |
| 2015 vs 2014 | 0.371 | -0.382 to 1.124 |
| 2016 vs 2014 | 0.336 | -0.316 to 0.988 |
| 2017 vs 2014 | 0.525 | -0.214 to 1.264 |
| 2018 vs 2014 | 0.640 | -0.039 to 1.318 |
| 2019 vs 2014 | 0.624 | -0.134 to 1.382 |
| 2020 vs 2014 | 0.772 | -0.104 to 1.648 |
| 2021 vs 2014 | 0.896 | -0.023 to 1.814 |
| 2022 vs 2014 | 0.830 | -0.143 to 1.804 |
| 2023 vs 2014 | 0.890 | -0.030 to 1.810 |

**Note:** Pairwise Bonferroni-adjusted comparisons of calendar-year fixed effects from the fully adjusted difference-in-differences model. Calendar year 2014 was selected as the reference year because it corresponds to the initial implementation period of Medicaid expansion under the Affordable Care Act. None of the adjusted comparisons reached statistical significance after Bonferroni correction for multiple testing.
